# Supplementary material
Source: publisher site journal article supplement (https://www.spandidos-publications.com/7157/downloadSupplementary)
Supplement: Supplementary file 1 [file downloadSupplementary]

## Sheet: Sheet1
Table SIV. The prediction of immune infiltration was summarized according to the four calculation methods.
Algorithm	Cells	Correlation	Significance
MCPcounter	B lineage	Negative	P<0.05
	Cytotoxic lymphocytes	Negative	P<0.001
	T cells	Positive	P<0.001
TIMER	B cell	Negative	P<0.01
	CD4 T cell	Negative	P<0.01
	CD8 T cell	Negative	P<0.001
	Dendritic	Negative	P<0.01
	Macrophage	Negative	P<0.01
CIBERSORT	T cells CD8	Negative	P<0.05
	T cells CD4 memory activated	Negative	P<0.01
	T cells regulatory (Tregs)	Negative	P<0.05
	NK cells resting	Negative	P<0.05
	Dendritic cells resting	Negative	P<0.001
	Dendritic cells activated	Positive	P<0.001
ssGSEA	activated B cell	Negative	P<0.05
	activated CD8 T cell	Negative	P<0.001
	activated dendritic cell	Negative	P<0.001
	CD56 bright natural killer cell	Negative	P<0.001
	eosinophil	Negative	P<0.001
	immature B cell	Negative	P<0.001
	immature dendritic cell	Negative	P<0.01
	MDSC	Negative	P<0.001
	Macrophage	Negative	P<0.01
	mast cell	Negative	P<0.001
	monocytrna	Negative	P<0.001
	neutrophilia	Negative	P<0.05
	plasmacytoid dendritic cell	Negative	P<0.01
	T follicular helper cell	Negative	P<0.01
	type 1 T helper cell	Negative	P<0.05
	type 17 T helper cell	Negative	P<0.001
